# Supplementary material
Source: PubMed Central journal article supplement (PMC2504884)
Supplement: M801320200_1.pdf [file M801320200_1.pdf]

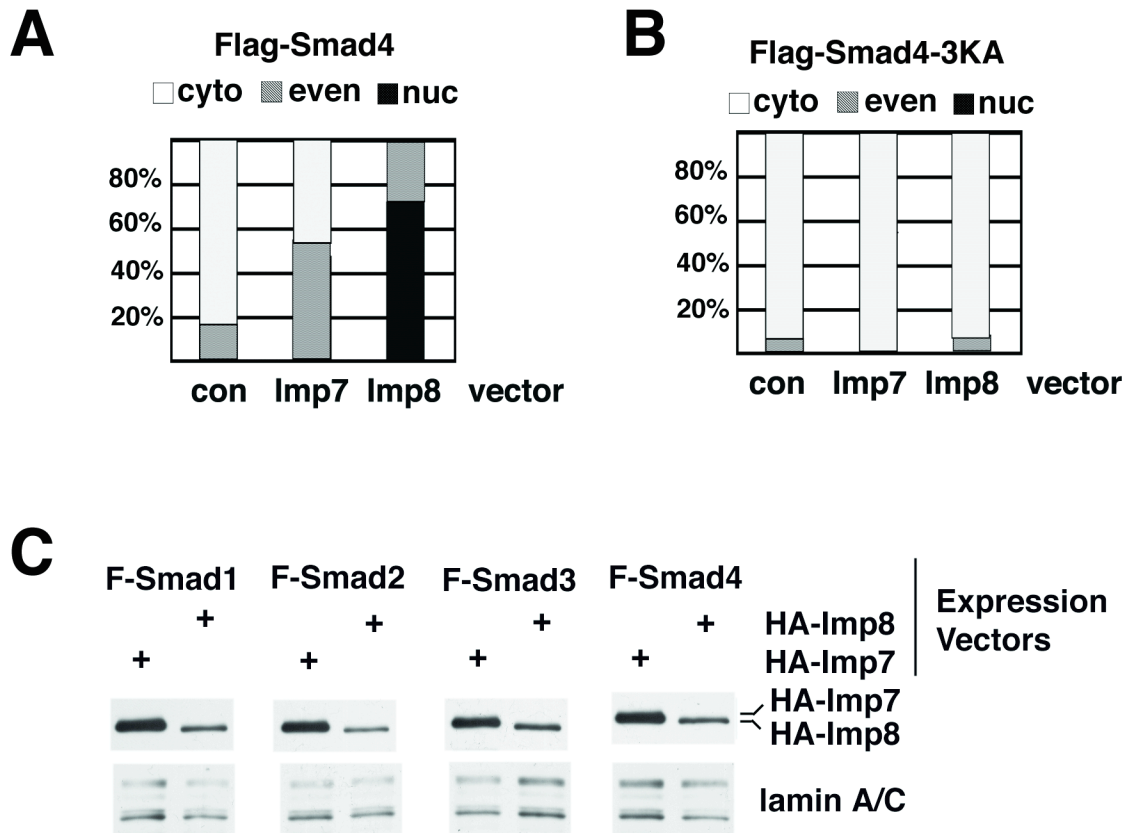

Figure S1

**Fig. S1. Effects of Imp7 or Imp8 overexpression on subcellular distribution of Smad4 in HeLa cells.** *A*, quantitation of experiments in Fig. 5A. Cells exhibiting different Flag-Smad4 distribution patterns were counted (n>250) and the percentages are shown in the chart. *B*, quantitation of experiments in Fig. 5B. Cells exhibiting different Flag-Smad4-3KA distribution patterns were counted (n>250) and the percentages are shown in the chart. *C*, HeLa cells were transfected with Flag-Smad4, and HA-Imp7 or -Imp8 as indicated. The whole cell extracts were analyzed by immunoblotting to examine the levels of overexpressed Imp7 and Imp8. Lamin A/C was used as a loading control.

**Table S1.** Quantification of nuclear and cytoplasmic staining (per unit area) of transfected Smad4 after indicated RNAi and LMB treatments in 293T cells (n=20 in each case).

|                                              |                 |                 |                 |                |
|----------------------------------------------|-----------------|-----------------|-----------------|----------------|
|                                              | control<br>-LMB | control<br>+LMB | siImp7b<br>+LMB | siImp8<br>+LMB |
| <b>N/C ratio<br/>mean<math>\pm</math> SD</b> | 0.7 $\pm$ 0.1   | 1.6 $\pm$ 0.2   | 1.0 $\pm$ 0.1   | 1.0 $\pm$ 0.2  |

**Table S2.** Quantification of nuclear and cytoplasmic staining of Smad7 (per unit area) when overexpressed in 293T cells (n=20 in each case).

|                                              |               |               |               |               |
|----------------------------------------------|---------------|---------------|---------------|---------------|
| <b>siRNA</b>                                 | control       | siImp7        | siImp8        | siImp7&8      |
| <b>N/C ratio<br/>mean<math>\pm</math> SD</b> | 1.7 $\pm$ 0.2 | 1.6 $\pm$ 0.2 | 1.7 $\pm$ 0.3 | 1.7 $\pm$ 0.2 |

**Table S3.** Quantification of nuclear and cytoplasmic staining (per unit area) of Smad4 in 293T cells with indicated siRNA and rescue plasmids transfection. All cells were treated with LMB (n=20).

|                                              |               |               |               |               |
|----------------------------------------------|---------------|---------------|---------------|---------------|
| <b>siRNA</b>                                 | control       | siImp8        |               |               |
| <b>rescue plasmid</b>                        | vector        | vector        | Imp8m         | Imp7          |
| <b>N/C ratio<br/>mean<math>\pm</math> SD</b> | 1.7 $\pm$ 0.3 | 1.0 $\pm$ 0.1 | 1.9 $\pm$ 0.3 | 1.0 $\pm$ 0.1 |

**Table S4.** Quantification of nuclear and cytoplasmic staining (per unit area) of Flag-Smad4 in 293T cells with indicated siRNA and rescue plasmids transfection. All cells were treated with LMB (n=20).

| <b>siRNA</b>                             | control       | siImp7&8      |               |               |
|------------------------------------------|---------------|---------------|---------------|---------------|
| <b>rescue plasmid</b>                    | vector        | vector        | Imp7m         | Imp8          |
| <b>N/C ratio mean<math>\pm</math> SD</b> | 1.7 $\pm$ 0.3 | 1.0 $\pm$ 0.2 | 1.1 $\pm$ 0.3 | 1.8 $\pm$ 0.3 |

**Table S5.** Quantification of nuclear and cytoplasmic staining (per unit area) of wild type and the 3KA mutant of Smad3 when expressed in Hela cells (n=15~20).

| <b>Smad3 vector</b>                      | WT            | 3KA           | WT            | 3KA           |
|------------------------------------------|---------------|---------------|---------------|---------------|
| <b>Imp8 vector</b>                       | -             |               | Imp8          |               |
| <b>N/C ratio mean<math>\pm</math> SD</b> | 1.4 $\pm$ 0.4 | 1.1 $\pm$ 0.2 | 2.6 $\pm$ 0.5 | 1.2 $\pm$ 0.2 |
